# Supplementary material
Source: publisher figshare collection journal article supplement (https://plos.figshare.com/articles/dataset/_/10005284)
Supplement: Supplementary file 1 [file 1]

Archive with 2 entries (2 files):
- pone.0224131.s001.pdf
- pone.0224131.s002.pdf
